Title: Temperature-induced transcriptional responses of a deep-biosphere bacterium, *Kosmotoga olearia*, illuminate its adaptation to growth from 20°C to 79°C

Running title: Thermal adaptation in *K. olearia*

Stephen M. J. Pollo<sup>a</sup>, Abigail A. Adebisoyi<sup>a\*</sup>, Timothy J. Straub<sup>b</sup>, Julia M. Foght<sup>a</sup>, Olga Zhaxybayeva<sup>b,c</sup> and Camilla L. Nesbø<sup>a,d#</sup>

<sup>a</sup>Department of Biological Sciences, University of Alberta, Edmonton, Alberta, Canada

<sup>b</sup>Department of Biological Sciences, Dartmouth College, Hanover, NH, USA

<sup>c</sup>Department of Computer Science, Dartmouth College, Hanover, NH, USA

<sup>d</sup>Centre for Ecological and Evolutionary Synthesis, Department of Biology, University of Oslo, Oslo, Norway

#Corresponding author: Camilla L. Nesbø, Department of Biological Sciences, 116 street and 85 Avenue, University of Alberta, Edmonton, Alberta, Canada, T6G 2E9. e-mail: [nesbo@ualberta.ca](mailto:nesbo@ualberta.ca)

\*Current address: Grande Prairie Regional College Research & Innovation, Grande Prairie, Alberta, Canada

Subject Category: Evolutionary Genetics

# **Abstract**

Temperature is one of the defining parameters of an ecological niche, and ambient temperature change is a physiological challenge faced by all living cells. Most organisms are adapted to growing within a temperature range that rarely exceeds ~ 30°C, but the deep subsurface bacterium *Kosmotoga olearia* is capable of growing over an extremely wide temperature range (20°C - 79°C). To pinpoint genomic determinants of this flexible phenotype, we compared transcriptomes of *K. olearia* cultures grown at its optimal 65°C to those at 30°C, 40°C, and 77°C. We found that changes in temperature significantly affect expression of 573 of 2,224 *K. olearia* genes. Notably, this transcriptional response elicits re-modeling of the cellular membrane and changes in metabolism, with increased expression of genes involved in energy and carbohydrate metabolism at high temperatures versus up-regulation of amino acid metabolism at lower temperatures. Such massive effects on the transcriptome indicate that temperature response is a complex polygenic trait. Moreover, at 77°C one third of the up-regulated genes are of hypothetical function, indicating that many features of high temperature growth are unknown. Via comparative genomic analysis of additional Thermotogae, we inferred that one of *K. olearia*'s strategies for low temperature adaptation is to increase gene copy number through both duplication and lateral acquisition. Our finding of coordinated temperature-specific gene expression patterns, and by extension temperature specific metabolism, suggests that *Kosmotoga* populations encounter variable environments, probably through migration. Therefore, we conjecture that deep subsurface microbial communities are more dynamic than currently perceived.

## Introduction

Microorganisms are capable of growing over an impressive temperature range, at least from -15°C to 122°C (Takai et al, 2008; Mykytczuk et al, 2013), and temperature is one of the most important physical factors determining their distribution, diversity, and abundance (Schumann, 2009). However, individual microbial species grow only within a much narrower temperature interval. For example, *Escherichia coli* O157:H7 thrives in the laboratory between 19°C and 41°C (Raghubeer & Matches, 1990), while *Geobacillus thermoleovorans* has a growth range of 37°C to 70°C (Dinsdale et al, 2011). Microorganisms with temperature ranges >50°C are rare, and research into the few with ranges >40°C has focused on psychrophiles (e.g., (Mykytczuk et al, 2013)). *Kosmotoga olearia* TBF 19.5.1 (hereafter referred to as *K. olearia*) is an anaerobic thermophile from the bacterial phylum Thermotogae with a growth range that spans almost 60°C (DiPippo et al, 2009). How does this lineage achieve such physiological flexibility and what are the evolutionary advantages and implications of having this capability?

Fluctuations in temperature induce broad physiological changes in cells, including alterations to cell wall and membrane composition, translation, and energy metabolism (Barria et al, 2013; Pollo et al, 2015; Schumann, 2009). These physiological changes can be classified into two broad types of cellular response. Cold or heat *shock* designates the changes observed *immediately* after the shift of a culture to a lower or higher temperature, while *prolonged growth* at a specific lower or higher temperature elicits an *acclimated* low- or high-temperature response (Barria et al, 2013). Most studies on prokaryotes have focused on temperature shock responses. Among the Thermotogae, responses to both heat shock and prolonged growth at high temperatures have been studied in the hyperthermophile *Thermotoga maritima*, which can grow between 55°C and 90°C (Pysz et al, 2004; Wang et al, 2012). During prolonged high temperature

growth *T. maritima* strongly up-regulates central carbohydrate metabolism genes and expresses a few typical heat shock protein genes (Wang et al, 2012). Little is known about how *T. maritima* responds to sub-optimal temperatures, although it encodes some genes implicated in cold shock response. For example, its family of cold shock proteins (Csp), which are nucleic acid chaperones known to be induced during cold shock and cold acclimation in mesophilic bacteria (Barria et al, 2013; Phadtare, 2004), exhibits nucleic acid melting activity at physiologically low temperatures (Phadtare et al, 2003). Similarly, responses to cold shock in a few other thermophiles involve many of the genes implicated in mesophiles' cold shock response (e.g., (Boonyaratanakornkit et al, 2005; Mega et al, 2010)). In this study we systematically assess bacterial physiological changes associated with response to prolonged growth at both high and low temperature using *K. olearia* as a model system.

The *K. olearia* genome (NC\_012785) has 2,302,126 bp and is predicted to encode 2,224 genes (Swithers et al, 2011). Within the Thermotogae, genome size, intergenic region size, and number of predicted coding regions correlate with the optimal growth temperature of an isolate (Zhaxybayeva et al, 2012), with hyperthermophilic Thermotogae genomes being the most compact. Phylogenetically, the Thermotogae order Kosmotogales comprises the genera *Kosmotoga* and *Mesotoga* spp., the latter being the only described mesophilic Thermotogae lineage (Pollo et al, 2015). Assuming a hyperthermophilic last common ancestor of the Thermotogae (Zhaxybayeva et al, 2009), the Kosmotogales can be hypothesized to have acquired wide growth temperature tolerance secondarily by expanding its gene repertoire. Moreover, it is likely that the ability of the Kosmotogales common ancestor to grow at low temperatures made the evolution of mesophily in *Mesotoga* possible (Pollo et al, 2015).

Such adaptations of lineages to new environments can be greatly facilitated by lateral gene transfer (LGT), since genes already "adapted" to the new conditions are readily available in the microbial communities of the new environment (Boucher et al, 2003). For instance, LGT has been implicated in adaptation to high temperature growth in hyperthermophilic bacteria, including *Thermotoga* spp., and to low temperature growth in Archaea (López-García et al, 2015; Pollo et al, 2015; Boucher et al, 2003). Genome analysis of the mesophilic *Mesotoga prima* revealed that it laterally acquired 32% of its genes after it diverged from other Thermotogae lineages (Zhaxybayeva et al, 2012). Many of the predicted gene donors are mesophiles, supporting the importance of lateral acquisition of genes already adapted to mesophilic conditions in the evolution of *Mesotoga*.

To further gain insights into mechanisms of bacterial temperature response we sequenced 17 transcriptomes from isothermal and temperature-shifted cultures of *K. olearia* and examined transcriptional differences at temperatures spanning its wide growth range. Additionally, through comparative genomic and phylogenetic analyses of identified temperature responsive genes and their homologs in two newly sequenced *Kosmotoga* isolates, as well as in genomes of other thermophilic and mesophilic Thermotogae, we investigated the importance of within-lineage evolution through LGT and gene duplication for adaptation of *K. olearia* to growth over a wide temperature range.

## Materials and Methods

**Bacterial culturing, and RNA and DNA isolation.** *K. olearia* was grown at different temperatures (4°C, 25°C, 30°C, 40°C, 65°C, and 77°C), but otherwise optimal conditions, as described in (2009) and Supplementary Information.

For each temperature treatment, RNA was extracted in either mid-log phase or late-log phase, using the Zymo Research Fungal/Bacterial RNA MiniPrep Kit (Cedarlane Laboratories, Ltd.; Burlington, Ontario) and following the manufacturer's protocols (Supplementary Table S1). The extracted RNA was sequenced on either an Ion Torrent PGM (RNA-Seq kit V2) or an Illumina MiSeq (TruSeq RNASeq v2 2x100 bp) from the libraries constructed following the manufacturer's instructions (Supplementary Table S1). The transcriptomes are available in the Sequence Read Archive (<http://www.ncbi.nlm.nih.gov/sra>) under the accession number SRP075860.

**RNA-Seq analysis.** For each transcriptome, sequenced reads were analyzed using the RNA-Seq module in CLC Genomics Workbench version 7.0.4 (<http://www.clcbio.com/>, CLC bio, Århus, Denmark), resulting in RPKM (Reads Per Kilobase of transcript per Million mapped reads) values for each gene, as described in *SI Materials and Methods*. RPKM values for all genes are listed in Supplementary Table S4. Differentially expressed genes were identified by doing pairwise comparisons of the transcriptomes of the isothermally grown cultures at 30°C, 40°C, and 77°C to the cultures grown at the optimal temperature of 65°C. The analyses used the “Empirical Analysis of DGE” function, which employs the “Exact Test” for two-group comparisons (2008). A gene was considered differentially expressed in a pairwise comparison if it had (i) > 20 reads in at least one of the two transcriptomes, (ii) a statistically significant difference in the RPKM values (corrected for multiple testing using False Discovery Rate [FDR] < 0.05), and (iii) a difference in RPKM values at least two-fold in magnitude. Principal Component Analysis (PCA) and biplot visualization were performed using R packages *ade4* and *bpca* respectively (Dray et al, 2007; Faria et al, 2013). Transcription start and stop sites and

number of transcripts were predicted using Rockhopper (McClure et al, 2013). For detailed descriptions see Supplementary Information.

**Comparative analyses of three *Kosmotoga* spp. genomes.** The genome of *K. olearia* (accession number CP001634, (Swithers et al, 2011)) was compared to genomes of *Kosmotoga* sp. DU53 (accession number JFHK000000000) and *K. arenicorallina* (accession number JGCK000000000) (Pollo et al, 2016) using the IMG portal (Markowitz et al, 2014) and Geneious v.9. Pairwise Average Nucleotide Identity (ANI) (2007) was calculated using the Enveomics Toolbox (Rodriguez-R & Konstantinidis, 2016). Protein-coding genes in each genome were classified as putatively laterally transferred using a customized version of HGTector (Zhu et al, 2014). For detailed descriptions see Supplementary Information.

## Results and Discussion

### Temperature shifts and isothermic conditions elicit different growth patterns in *K. olearia*.

Under laboratory conditions in liquid anaerobic medium we observed growth of *K. olearia* at temperatures as low as 25°C and as high as 79°C, with optimal growth at 65°C (Figure 1 and Supplementary Figure S1). Using a non-linear regression model (Ratkowsky et al, 1983) we estimate a growth-permissive temperature range of 20.2 – 79.3°C, consistent with the previously reported wide growth range of this isolate (DiPippo et al, 2009). Interestingly, we were not able to cultivate *K. olearia* at temperatures near its range boundaries (30°C and 77°C) by direct transfer from 65°C cultures. Instead, the growth temperature had to be changed sequentially in  $\leq 10^\circ\text{C}$  increments. Particularly at the extremes, even small temperature shifts caused both a longer lag phase and a slower growth rate compared to isothermal cultures (Figure 1 and Supplementary Figure S1). This phenomenon has also been noted for mesophilic bacteria,

especially for transitions from high to low temperature (Swinnen et al, 2004). Our observations suggest that cells shifted to a new temperature need to undergo large physiological changes that require time (i.e. an ‘acclimation’ period (Barria et al, 2013)) and that these physiological challenges are too great to overcome when temperature changes are large. To illuminate *K. olearia*'s transcriptional responses to changes in temperature we sequenced 17 transcriptomes of replicate mid- to late-log cultures grown isothermally at 30°C, 40°C, 65°C, and 77°C, and of two 30°C cultures shifted to 25°C and 4°C (see Supplementary Table S1 and Supplementary Information).

**Architecture of the *K. olearia* transcriptome.** Analysis of transcription start and stop sites predicted a minimum of 916 transcriptional units (TU) in *K. olearia* (Supplementary Information and Supplementary Table S2), 52% of which consist of a single gene. This fraction of single-gene TUs lies between the 43% recorded for *T. maritima*, which has been shown to have a streamlined genome and a low-complexity transcriptome (Latif et al, 2013), and the 65% reported for *E. coli* (Cho et al, 2009). The average TU length of ~2.39 genes in *K. olearia* is less than the 3.3 genes per transcript of *T. maritima* (Latif et al, 2013) but closer to 2.2 genes per transcript in the mesophilic firmicute *Geobacter sulfurreducens* (Qiu et al, 2010) and 1-2 genes per transcript in Bacteria in general (e.g. (Cho et al, 2009)). Given that the *K. olearia* genome has more intergenic DNA than *T. maritima*'s genome (the ratio of the nucleotides located in non-coding vs. coding regions is 0.13 in *K. olearia* and 0.06 in *T. maritima*), the shorter TU lengths in *K. olearia* may point to more flexible transcriptional regulation and may be linked to *Kosmotoga*'s ability to grow under more variable conditions.

**Consistent energy generation across different temperature conditions.** *K. olearia* produces ATP from pyruvate using a biochemically well-understood fermentation pathway that



generates hydrogen, carbon dioxide and acetate ((DiPippo et al, 2009); Figure 2 and data not shown). Given that pyruvate was the carbon and energy source in all experiments, we surveyed 51 genes predicted to be involved in pyruvate catabolism and identified 15 genes with consistently high expression in all temperature treatments (Figure 2 and Supplementary Table S3). In addition to indirectly validating the previously known functional annotations of these genes, we furthermore propose that genes KOLE\_1509 – 1513 encode a pyruvate ABC transporter (Figure 2). Their current annotation as a peptide ABC transporter may be erroneous since most of the peptide ABC transporters predicted in *T. maritima* using bioinformatics have been shown instead to bind and transport sugars (Nanavati et al, 2006). Our findings also indicate that the enzymes involved in the pyruvate fermentation pathway are versatile enzymes that are expressed and are capable of functioning across an extremely wide temperature range.

**Identification of temperature-related transcriptional responses in *K. olearia*.** Based on hierarchical clustering, transcriptome replicates at the same temperature group together (Supplementary Figure S2 and Supplementary Information), suggesting that the observed changes in transcription are due to the culture growth temperature. Principal Component Analysis (PCA) clearly separated the transcriptomes into quadrants corresponding to optimal (65°C), intermediate (40°C), low (30°C, 25°C and 4°C) and high (77°C) growth temperatures (Figure 3). Several genes with a high correlation between their expression level and a specific growth temperature (vectors in Figure 3, Supplementary Table S4) are known to be involved in temperature response. For example, expression of the protease KOLE\_1599 positively correlated with the 77°C transcriptomes, where high expression of proteases was expected based on their involvement in heat shock response in *T. maritima* (Pysz et al, 2004). Similarly, expression of the cold shock protein genes KOLE\_0109 and KOLE\_2064 positively correlated with low

temperature growth. Lastly, some observed changes presumably were due to the expected decreased metabolic activity of the culture at a non-optimal temperature. This can be exemplified by the high expression and strong correlation of the central carbon metabolism gene glyceraldehyde-3-phosphate dehydrogenase (Kole\_2020) with the 65°C transcriptomes. Overall, the observed differential expression of known temperature-responsive genes implies that the remaining detected transcriptional changes also likely reflect temperature-related trends in gene expression.

**Detailed analysis of changes in gene expression in response to prolonged growth at different temperatures.** Putative temperature-responsive genes were identified by pairwise comparisons of each isothermic temperature treatment to the optimal growth at 65°C (i.e., 30°C vs 65°C, 40°C vs 65°C, and 77°C vs 65°C). Across all comparisons 573 genes fulfilled our criteria for temperature responsiveness (i.e.,  $\geq 2$ -fold difference in expression,  $> 20$  reads per transcript, False Discovery Rate  $< 0.05$ ) with 430, 115, and 169 genes detected in the 30°C vs 65°C, 40°C vs 65°C, and 77°C vs 65°C comparisons respectively (Supplementary Table S5). Most of these genes were up-regulated (Supplementary Figure S3) with the exception of down-regulation of many genes involved in carbohydrate and energy metabolism at 30°C (Clusters of Orthologous Groups [COG] categories G and C). The latter probably reflects the very slow growth rate at this temperature. Curiously, despite the slower growth rate at 77°C, genes from COG C and G categories were over-represented and up-regulated at this temperature (Figure 4 and Supplementary Figure S3; discussed in detail below).

In all transcriptomes the list of putative temperature-responsive genes was depleted of genes involved in translation (COG category J) and nucleotide metabolism (COG category F) (Figure 4 and Supplementary Figure S3) and enriched in genes involved in replication,

recombination and repair (COG category L, particularly at 30°C), and signal transduction (COG category T). Most of the identified COG category L genes are either mobile elements or CRISPR-associated proteins. Movement of mobile genetic elements is a common feature of stress responses (Foster, 2007) and the up-regulation of CRISPR-associated genes could therefore be a response to the proliferation of these elements. Differential expression of the signal transduction genes suggests the importance of these systems for regulating cellular responses at all tested temperatures. Additionally, at both 30°C and 77°C many genes encoding transcription regulators (COG category K, transcription) are up-regulated, suggesting that prolonged growth at sub- and supra-optimal temperatures results in detectable changes in transcriptional gene regulation in *K. olearia*. Below we discuss the identified temperature-responsive gene expression patterns in more detail.

***At 40°C there are pronounced differences in membrane fatty acid composition but no signs of cold stress.*** Although the growth rate of *K. olearia* at 40°C is only one-third of that at the optimum 65°C (Figure 1 and Supplementary Figure S1), clustering analysis suggested that the 40°C transcriptome was most similar to that at 65°C (Figure 3 and Supplementary Figure S2). The slower growth rate was reflected by the four most highly expressed temperature responsive genes at 40°C showing significantly lower expression than at 65°C, including growth-related genes like the toga protein Koe\_1501 (Supplementary Table S5). Yet, 94 of 115 putative temperature responsive genes were up-regulated (Supplementary Table S5), suggesting that slower metabolism is not the only explanation for the observed transcriptional response to growth at 40°C.

Lipid metabolism (COG category I) appears to be particularly important at 40°C. For instance, all of the predicted fatty acid synthesis genes showed the highest expression at 40°C

(Supplementary Table S5, Supplementary Figure S4), with two genes involved in synthesis of unsaturated fatty acids (Kole\_0968) and initiation of fatty acid synthesis (Kole\_0969) having significantly higher expression. Biochemical analyses of total fatty acids at 40°C and 65°C showed a much greater diversity of fatty acids at 40°C (Supplementary Table S6), which may explain the higher demand for these genes at lower temperatures. Interestingly, at 40°C in particular there was increased expression of a phosphate ABC transporter (Kole\_0707 – Kole\_0711, Supplementary Table S5), which may be linked to the increased production of polar membrane lipids at moderately low temperatures. Maintenance of a functional cell membrane is crucial for survival, and bacteria respond to changes in temperature by altering the membrane's fatty acid composition (de Mendoza, 2014). The observation that lipid metabolism genes were among the highly expressed genes at low temperature, despite the lower growth rate, suggests that changes to the cell membrane composition are one of the most important adaptations for survival of *K. olearia* at lower temperatures.

Protein folding at a lower temperature is another physiological challenge that may require enzymatic assistance. For example, proline isomerization happens spontaneously at high temperatures, but at lower temperatures (e.g., 37°C) the reaction needs a catalyzing enzyme - peptidylprolyl isomerase (PPIase) (Godin-Roulling et al, 2015). Not surprisingly, *K. olearia* has three temperature-responsive PPIase genes: two PpiC-type genes (Kole\_1682 and Kole\_0383) that are both highly expressed at 40°C, and one FKBP-type gene (Kole\_1745), which shows high expression at all temperatures except 77°C (Supplementary Table S5). These expression patterns suggest PPIase is particularly important at moderately low temperatures where the cells are still relatively active. However, the enzymes known to assist protein folding in cellular stress responses, chaperones (e.g., GroEL and Hsp) and protease Do, were significantly down-

regulated at 40°C (Supplementary Table S5). Among other typical cold stress related proteins, only one of *K. olearia*'s three cold shock proteins (Kole\_0109) showed significantly higher expression at 40°C and its up-regulation was merely moderate when compared to its expression levels at 30°C (Supplementary Table S5). This overall lack of induction of typical stress-related genes, especially when compared to 30°C and 77°C (see below), suggests that 40°C is still within the "Goldilocks" temperature range for *K. olearia*.

**K. olearia is in cold stress at 30°C.** Transcriptomes from 30°C, 25°C, and 4°C cultures were very similar to each other (Figure 3 and Supplementary Figure S2). Overall, the gene expression differences observed at 30°C were even more pronounced at 25°C and 4°C (Supplementary Table S5). However, due to adjustments in culture handling required to obtain enough biomass at lower temperatures (see Supplementary Information), some gene expression patterns at 25°C and 4°C may be due to the cells either responding to fresh medium or displaying an immediate cold shock response. Therefore, we focused our further analyses on genes differentially expressed at 30°C, while the 25°C and 4°C transcriptomes were used to confirm the patterns observed at 30°C.

Two of three Csp-encoding genes in *K. olearia* (Kole\_0109 and Kole\_2064, Supplementary Table S5) were among the three most highly expressed up-regulated genes at low temperatures, suggesting that the cells were in a cold-stressed state during growth at ≤30°C. Further support for this hypothesis comes from significant up-regulation of genes linked to bacterial cold response (Barria et al, 2013): a DEAD/DEAH -box RNA helicase (Kole\_0922), RbfA (Kole\_2103), and NusA (Kole\_1529). Hence, the thermophile *K. olearia* uses homologs of the cold response genes employed by mesophilic bacteria at physiologically low temperatures.

With decreasing temperature, we observed up-regulation of several ribosomal proteins (Figure 3). Some (L10 (Kole\_1840) and L7/L12 (Kole\_1839)) have already been linked to both cold shock and prolonged low temperature growth responses in bacteria (e.g., (Alreshidi et al, 2015)). The most dramatic differential expression, however, was observed for a ribosomal protein gene not yet connected to cold response (L34; Kole\_0258). L34, a bacteria-specific ribosomal protein hypothesized to be a relatively recent addition to the evolving ribosome (Fox, 2010), is required for proper ribosome formation (Akanuma et al, 2014). A *Bacillus subtilis* mutant lacking the L34 gene showed slow growth at low temperature (Akanuma et al, 2012), suggesting a role for L34 in this condition. Many ribosomal proteins are recruited for extra-ribosomal functions (Bhavsar et al, 2010), hence some of the up-regulated ribosomal proteins may have alternative roles in response to low temperature that are unrelated to the ribosome itself. However, genes encoding ribosomal RNA (rRNA) methyltransferases, rmlH (Kole\_1718) and rmlL (Kole\_0897), were also significantly up-regulated, and methylation of rRNAs has been associated with responses to environmental stress, including temperature (Baldrige & Contreras, 2014). Combined with observations that ribosomes need to be fine-tuned to function properly at low temperature (Barria et al, 2013), we hypothesize that *K. olearia* modifies its ribosome by changing stoichiometry of its components and by methylating rRNA. Time required for such ribosomal adjustments could also explain the longer lag phase following temperature shifts (Supplementary Figure S1).

To detect a decrease in environmental temperature and elicit an appropriate regulatory response, some bacteria have evolved two-component cold sensors (de Mendoza, 2014). These signal transduction systems consist of a sensor, a membrane-integrated protein with a kinase domain that detects changes in the fluidity of the cell membrane, and the cytoplasmic response

regulator, a protein that induces expression of cold-responsive genes. In *K. olearia*, a histidine kinase with two predicted transmembrane domains (Kole\_1017) and two response regulators (Kole\_1015 and Kole\_1016) showed a steady increase in expression as temperatures decreased from 65°C, but no significant change in expression at 77°C (Supplementary Table S5), leading us to hypothesize that these genes encode a cold-sensing two-component system.

***Increased amino acid metabolism at sub-optimal temperatures.*** At lower growth temperatures (and especially at and below 30°C) we observed an over-representation of genes involved in amino acid metabolism (COG category E). At 30°C, and to a lesser extent at 40°C, a peptide ABC transporter gene (Kole\_2046 – Kole\_2050) and several genes in the arginine (Kole\_0092 – Kole\_0097) and lysine (Kole\_0104 – Kole\_0107, 30°C only) biosynthesis pathways were up-regulated, suggesting the potential for accumulation of peptides and amino acids (or their intermediates) at lower temperatures. At 30°C there was also significant up-regulation of a citrate synthase gene (Kole\_1230). Intriguingly, in *Staphylococcus aureus* citrate was shown to accumulate during prolonged cold stress (Alreshidi et al, 2015), which could also be the case for *K. olearia*. Alternatively, citrate synthase, together with isocitrate dehydrogenase (Kole\_1227), may be involved in converting pyruvate or acetyl-CoA to 2-oxoglutarate, a precursor for several amino acids including arginine. Accumulation of both arginine and lysine was observed during low temperature growth of *Clostridium botulinum*, where these amino acids were suggested to act as compatible solutes (Dahlsten et al, 2014). Interestingly, while the cells may accumulate peptides at 30°C, at 40°C there was increased expression of an oligo-peptidase (Kole\_1190) and genes involved in lysine degradation (Kole\_0958, Kole\_0963 – Kole\_0966). Such distinguishably different metabolic responses to moderately low (40°C) and low ( $\leq 30^\circ\text{C}$ ) temperatures suggest a fine-tuned temperature-dependent peptide turnover.

Two paralogs of ornithine carbamoyl-transferase (*ArgF*; Kole\_1433 and Kole\_2071) showed significantly lower expression at both 40°C and 30°C. The amino acid ornithine is an intermediate of arginine synthesis and lower expression of *ArgF* suggests that ornithine, rather than arginine, may accumulate at sub-optimal temperatures. However, ornithine has also been implicated in biofilm formation and species cross-talk (Sakanaka et al, 2015), suggesting a possible alternative role of this amino acid in cellular responses to low temperature. Our unpublished observation of increased clumping of *K. olearia* cells grown at 30°C indirectly supports this hypothesis.

Re-modelling of amino acid metabolism at low temperatures has also been observed in other bacteria (e.g., (Dahlsten et al, 2014; Ghobakhlou et al, 2015)). Interestingly, the genome of *M. prima* encodes more genes involved in amino acid metabolism than the genomes of *K. olearia* and other Thermotogae (Zhaxybayeva et al, 2012). Perhaps the mesophilic *Mesotoga* spp. have adapted to the increased need for peptides by expanding existing and acquiring new amino acid metabolism gene families. Amino acid metabolism genes are also among the most numerous bacterial genes laterally acquired by mesophilic Archaea, which was hypothesized to reflect their adaptation to low temperature growth (López-García et al, 2015).

**K. olearia is in heat stress at 77°C.** Both the multivariate (Figure 3) and clustering (Supplementary Figure S2) analyses showed that the 65°C and 77°C transcriptomes are distinct. Since 77°C is almost the upper limit for *K. olearia* growth, we hypothesize that the observed differences in expression profiles at 77°C reflect a cell-wide heat stress response. Of the 169 differentially expressed genes, 119 showed increased expression at 77°C (Supplementary Table S5). Hypothetical proteins made up a sizeable fraction (41 genes; 34%) of the 119 genes, indicating that adaptation to growth at sustained high temperature remains largely



uncharacterized. Only one of the known heat shock response genes (Pysz et al, 2004), the extreme heat stress sigma factor-24 (rpoE, K02150), was up-regulated. Among the most highly expressed genes were the structural RNAs rps (K02100), ssrA (K02006), and rnpB (K02049) (Figure 3), suggesting an increased rate of RNA turnover at supra-optimal temperature. As mentioned earlier, carbohydrate and energy metabolism genes (COG category C and G) were also up-regulated. It is unclear, however, if the underlying cause is the increased turnover of enzymes at elevated temperatures, or a demand for more enzymes due to increased carbohydrate catabolism. Notably, two genes predicted to produce amino sugars for cell surface polysaccharides (K01281 and K01282) were also moderately up-regulated at 40°C, suggesting that cell surface polysaccharides may contribute to temperature adaptation at both sub- and supra-optimal temperatures. Increased carbohydrate metabolism in response to prolonged growth at supra-optimal temperature has been observed previously in *T. maritima* (Wang et al, 2012) and therefore may be a common adaptation to high temperature growth in the Thermotogae. The prolonged supra-optimal temperature growth of *T. maritima* also did not involve up-regulation of typical heat-shock response proteins (Wang et al, 2012). This highlights the difference between cellular response to an immediate heat-shock and to prolonged growth at supra-optimal temperature, and in general justifies classifying the cellular response to temperature into these two distinct categories.

**General stress response genes.** Since we hypothesize that at 77°C and 30°C *K. olearia* cells are under stress, genes that are significantly up-regulated at both temperatures are candidates for a general temperature-stress response. There are 25 such genes, three of which were also significantly up-regulated at 40°C (Supplementary Table S5). Among the most highly expressed of the 25 genes were K02091, a gene with a distantly related homolog in only two

other Thermotogae, and KOLE\_0418, a gene that within the Thermotogae has homologs only in *Mesotoga* spp. Both genes encode proteins of unknown function. Given such limited distribution within the Thermotogae, these genes may be involved in *Kosmotoga*-specific adaptation to a wide growth temperature range.

**Conservation of *K. olearia*'s temperature-responsive genes across Kosmotogales.** All genes that are required for adaptation and response of *K. olearia* to a wide range of growth temperatures are expected to be present in other *K. olearia* isolates, whereas some may be absent from *Kosmotoga* species having a narrower spectrum of growth temperature. Therefore, we compared the *K. olearia* genome to the genomes of *Kosmotoga* sp. DU53 and *Kosmotoga arenicorallina* (Pollo et al, 2016). *Kosmotoga* sp. DU53 has a similar growth temperature range (observed range 25°C - 79°C, Supplementary Table S7) and >99% average nucleotide identity (ANI) when compared to *K. olearia*, while *K. arenicorallina* exhibits a narrower growth temperature range (observed range 35°C - 70°C, Supplementary Table S7) and has only 84% ANI when compared to *K. olearia*.

Indeed, the *Kosmotoga* sp. DU53 genome lacks only 10 of the 573 *K. olearia* putative temperature-responsive genes (BLASTP and TBLASTN searches, E-value < 10<sup>-3</sup>, Supplementary Table S5). All 10 genes were expressed in *K. olearia* at relatively low levels (the highest average expression value of 453 is for KOLE\_0200 at 77°C), suggesting that they are unlikely to be essential for high or low temperature growth. On the other hand, the *K. arenicorallina* genome does not have detectable homologs of 103 of the 573 putative temperature-responsive genes in *K. olearia* (BLASTP and TBLASTN searches, E-value < 10<sup>-3</sup>) (Supplementary Table S5). The list of absent genes includes several of the arginine and lysine biosynthesis genes that are up-regulated in *K. olearia* during growth at ≤30°C, and seven of the

hypothetical proteins up-regulated at 77°C. Therefore, we hypothesize that these 103 genes play a role in extending the growth range of *K. olearia* to  $\leq 35^{\circ}\text{C}$  and  $\geq 70^{\circ}\text{C}$ .

**Role of lateral gene transfer in thermoadaptation of *K. olearia*.** Obtaining "pre-adapted" genes from other genomes is one way prokaryotes adjust to new environmental conditions (Boucher et al, 2003). Using HGTector (Zhu et al, 2014) we predicted that 354 of *K. olearia*'s 2,118 protein coding genes have been acquired laterally by *K. olearia* or the Kosmotogales (i.e., *Kosmotoga* and *Mesotoga*), presumably representing LGT events occurring after the divergence of Kosmotogales from other Thermotogae (Supplementary Table S8). Eighty-eight of the 354 genes were temperature responsive (Supplementary Table S5, Supplementary Figure S5A and S5B), including several already discussed highly expressed genes (Table 1 and Supplementary Table S5). Notably, LGT appears to be especially important in *K. olearia*'s adaptation to the lower growth temperatures. Thirty-eight of the 88 temperature-responsive laterally acquired genes are shared with the strictly mesophilic *Mesotoga*, and most of them were highly expressed at lower temperatures, 30°C in particular (Supplementary Figure S5C). Among these are the previously discussed rRNA methyltransferases (Kole\_1718 and Kole\_0897). The fatty acid synthesis genes (Kole\_0969- Kole\_0973) that are up-regulated at 40°C, as well as their Kosmotogales and *Mesotoga* homologs, form a distantly related sister clade to other Thermotogae lineages (Supplementary Figure S6A), suggesting that these genes may have been acquired from an un-sampled lineage. Similarly, the Csp-encoding gene highly expressed at 30°C (Kole\_0109) is placed outside of the Thermotogae clade (Supplementary Figure S6B). Predicted acquisition of the fatty acid synthesis and Csp genes by (now mesophilic) Archaea (López-García et al, 2015) additionally argues for the importance of these genes in adaptation to low temperature growth.

It is notable that some putative lateral acquisitions by *K. olearia* do not have homologs in *Mesotoga*. These include genes encoding the predicted cold temperature sensor (Kole\_1015 – Kole\_1017), one of the PPIase genes (Kole\_1745), as well as the canonical cold response enzyme DEAD/DEAH box RNA helicase (Kole\_0922). Lack of these genes in *Mesotoga* suggests their potential importance for *K. olearia*'s ability to grow over a wide temperature range.

**Role of gene family expansion and lineage-specific gene evolution in thermoadaptation.** Expansion of cold-responsive gene families may represent a common strategy for low temperature adaptation, as has been noted in many bacteria, especially in psychrophiles (e.g. (Piette et al, 2010)). *K. olearia* exhibits the same trend. For example, when compared to other Thermotogae, all three analyzed *Kosmotoga* genomes harboured more copies of Csp-encoding genes (Supplementary Table S9). Additionally, *K. olearia* has extra homologs (Kole\_0111 and Kole\_0110) of the putative cold sensor system discussed above. The observed gene family expansions might be important not only for low temperature growth, but also for growth over a wide temperature interval. For example, *Mesotoga* functions with only a single Csp gene, demonstrating that having more copies of this gene is not required for low temperature growth. Having several copies of these genes, however, allow *K. olearia* the opportunity to regulate them differently at different temperatures. Similarly, the additional cold sensor homologs do not show co-ordinated temperature response: Kole\_0110 is up-regulated at 40°C, while Kole\_0111 is up-regulated at 77°C (Table 1). Therefore, these additional homologs may represent sensors tuned to different temperatures.

Gene family expansions can be achieved via within-lineage gene duplication or through LGT. A combination of these mechanisms appears to be at work in *K. olearia*, as demonstrated

by the phylogenetic analyses of Csp genes (Supplementary Figure S6B). Similarly, even though several Thermotogae genomes contain as many copies of PPIase genes as do *Kosmotoga* genomes (Supplementary Table S9), phylogenetic analysis suggests that in the Kosmotogales this gene family has only recently been expanded by both LGT (the FKBP-type, Table 1) and duplication (the PpiC-type, Supplementary Figure S6C).

However, the role of within-lineage evolution of specific genes in response to changing environmental conditions should not be neglected. For example, typical cold response genes RbfA (Kole\_2103) and NusA (Kole\_1529) were not laterally acquired, but nevertheless show high expression only at 30°C. Deciphering adaptive changes that occurred in such genes compared to thermophilic homologs may elucidate molecular mechanisms of low temperature adaptation.

**Why maintain the capacity for growth over such a wide temperature range?** Most bacteria are under selection to eradicate extraneous DNA (and genes) from their genomes (Graur, 2016), and among free-living bacteria Thermotogae in general have very compact genomes. Kosmotogales, however, have notably larger genomes than other thermophilic Thermotogae (Pollo et al, 2015; Zhaxybayeva et al, 2012), raising the possibility that expanded genomes are advantageous in *K. olearia*'s habitat. As discussed above, many of the genes in *K. olearia*, such as the cold-sensor system, were expressed only at specific sub- or supra-optimal temperatures, but do not seem to be important for growth at other temperatures (Table 1 and Supplementary Table S5). The regulated response to low temperatures and the preservation of the laterally acquired genes specifically expressed at 40°C and 30°C suggest that *K. olearia* encounters environments with very different temperatures frequently enough to maintain these genes in its genome. Such environments may include oil reservoirs located at different depths, as well as

marine sediments influenced by the mixing of cold deep sea water and hydrothermal fluids (Sievert & Vetriani, 2012). As a result, this lineage was likely selected to become a temperature generalist. This conjecture is supported by the environmental conditions of the subsurface environments and marine hydrothermal vents from which *Kosmotoga* spp. have been isolated (DiPippo et al, 2009; Nunoura et al, 2010; L'Haridon et al, 2014). *K. olearia* was isolated from a deep subsurface oil reservoir with *in situ* temperature of 68°C (DiPippo et al, 2009), but its 16S rRNA sequences also have been detected in many oil fields having *in situ* temperatures of 20°C–50°C (Nesbø et al, 2010). *Kosmotoga* sp. DU53, which is most similar to *K. olearia*, was isolated from an oil reservoir with an *in situ* temperature of ~50°C, while *K. arenicorallina* was isolated from hydrothermal sediments with a temperature of ~40°C (Nunoura et al, 2010). Notably, *K. olearia* was also identified as a major constituent in a metagenome from a deep subsurface oil reservoir with *in situ* temperature of 85°C and pressure of 25MPa (Kotlar et al, 2011). While the reservoir temperature is higher than the maximum *K. olearia* growth temperature reported here, elevated pressure could extend *K. olearia*'s temperature maximum, as has been demonstrated for some Archaea (e.g. (Takai et al, 2008)). Therefore, *K. olearia*'s growth temperature range under natural conditions may be even broader than 20-79°C.

**Concluding Remarks.** The present study demonstrates that a bacterium with a relatively small genome can use transcriptional changes to respond effectively to large changes in temperature. We showed that *K. olearia*'s response to sustained exposure to a non-optimal temperature includes up-regulation of hundreds of genes. A substantial fraction of these genes have been acquired laterally, suggesting that LGT is an evolutionarily successful strategy for expansion of temperature tolerance; however, gene duplication and subsequent sub-functionalization of the paralogs also plays an important adaptive role.

The ability of *K. olearia* to inhabit both high and low temperature environments suggests that members of this lineage encounter environments with large temperature fluctuations and/or frequently migrate across ecological niches within the deep biosphere (e.g., between deep and shallow subsurface oil reservoirs). Therefore, the subsurface environments, as well as their microbial populations, might be viewed as a connected archipelago instead of isolated islands. As a corollary, we speculate that *K. olearia*-like ecological generalists could also facilitate LGT among seemingly isolated deep biosphere microbial communities adapted to a narrower ecological niche. For example, we have previously demonstrated high levels of gene flow among hyperthermophilic *Thermotoga* populations in subsurface oil reservoirs and marine hydrothermal vents (Nesbø et al, 2015), environments that are separated by non-thermophilic surroundings. The mechanism of such gene flow is not yet known, but *K. olearia*-like Thermotogae capable of growing both in subsurface oil reservoirs and adjacent marine sediments could serve as mediators of gene exchange.

Although some of the identified 573 temperature-responsive genes are already known to be expressed in Bacteria and Archaea grown at high or low temperatures, most of the up-regulated genes have not previously been implicated in temperature response and are in need of better functional and biochemical characterization. For example, the majority of the *K. olearia* genes responsive to elevated temperature encode proteins of unknown functions. Versatile proteins that work across a broad range of temperatures also warrant further biochemical and evolutionary analyses, as understanding of their enzymatic flexibility can aid the design of commercially important thermostable proteins.

Supplementary information is available at The ISME Journal's website.

516

## 517 **Acknowledgements**

518 This work was supported by a Research council of Norway award (project no. 180444/V40) to  
 519 C.L.N.; a Simons Investigator award from the Simons Foundation, a Dartmouth College Walter  
 520 and Constance Burke Research Initiation Award, and Dartmouth College start-up funds to O.Z.;  
 521 and an NSERC Alexander Graham Bell Canada Graduate Scholarship CGS-M to S.M.J.P. The  
 522 funders had no role in study design, data collection and interpretation, or the decision to submit  
 523 the work for publication. We thank Rhianna Charchuk for technical assistance, Dr. Amanda J.  
 524 Lohan for advice and discussion of RNA-Seq methodology, Dr. Karen Budwill for head-space  
 525 gas analyses, and Jennifer Franks for initial discussions of lateral gene transfer detection  
 526 methods.

527

## 528 **Conflict of interest**

529 The authors declare no conflict of interest

530

## 531 **References**

- 532 Akanuma G, Nanamiya H, Natori Y, Yano K, Suzuki S, Omata S, *et al.* (2012). Inactivation of  
 533 ribosomal protein genes in *Bacillus subtilis* reveals importance of each ribosomal protein for cell  
 534 proliferation and cell differentiation. *J Bacteriol* 194:6282-6291.
- 535 Akanuma G, Kobayashi A, Suzuki S, Kawamura F, Shiwa Y, Watanabe S, *et al.* (2014). Defect  
 536 in the formation of 70S ribosomes caused by lack of ribosomal protein L34 can be suppressed by  
 537 magnesium. *J Bacteriol* 196:3820-3830.



538 Alreshidi MM, Dunstan RH, Macdonald MM, Smith ND, Gottfries J, Roberts TK (2015).  
539 Metabolomic and proteomic responses of *Staphylococcus aureus* to prolonged cold stress.  
540 Journal of proteomics 121:44-55.

541 Baldrige KC, Contreras LM (2014). Functional implications of ribosomal RNA methylation in  
542 response to environmental stress. Crit Rev Biochem Mol Biol 49:69-89.

543 Barria C, Malecki M, Arraiano CM (2013). Bacterial adaptation to cold. Microbiology 159:2437-  
544 2443.

545 Bhavsar RB, Makley LN, Tsonis PA (2010). The other lives of ribosomal proteins. Hum  
546 Genomics 4:327-344.

547 Boonyaratanakornkit BB, Simpson AJ, Whitehead TA, Fraser CM, El-Sayed NMA, Clark DS  
548 (2005). Transcriptional profiling of the hyperthermophilic methanarchaeon *Methanococcus*  
549 *jannaschii* in response to lethal heat and non-lethal cold shock. Environ Microbiol 7:789-797.

550 Boucher Y, Douady CJ, Papke RT, Walsh DA, Boudreau MER, Nesbø CL, *et al.* (2003). Lateral  
551 gene transfer and the origins of prokaryotic groups. Annu Rev Genet 37:283-328.

552 Cho B, Zengler K, Qiu Y, Park YS, Knight EM, Barrett CL, *et al.* (2009). The transcription unit  
553 architecture of the *Escherichia coli* genome. Nat Biotechnol 27:1043-1049.

554 Dahlsten E, Isokallio M, Somervuo P, Lindström M, Korkeala H (2014). Transcriptomic analysis  
555 of (group I) *Clostridium botulinum* ATCC 3502 cold shock response. PloS one 9:e89958.

556 de Mendoza D (2014). Temperature sensing by membranes. Annu Rev Microbiol 68:101-116.

557 Dinsdale AE, Halket G, Coorevits A, van Landschoot A, Busse HJ, de Vos P, *et al.* (2011).  
558 Emended descriptions of *Geobacillus thermoleovorans* and *Geobacillus thermocatenulatus*. Int J  
559 Syst Evol Microbiol 61:1802-1810.

560 DiPippo JL, Nesbø CL, Dahle H, Doolittle WF, Birkland N, Noll KM (2009). *Kosmotoga*  
561 *olearia* gen. nov., sp. nov., a thermophilic, anaerobic heterotroph isolated from an oil production  
562 fluid. Int J Syst Evol Microbiol 59:2991-3000.

563 Dray S, Dufour AB, Chessel D (2007). The ade4 Package - II : Two-table and K-table methods.  
564 R News 7:47-52.

565 Faria JC, Demétrio CGB, Allaman IB (2013). Bpca: Biplot of Multivariate Data Based on  
566 Principal Components Analysis. UESC and ESALQ: Ilheus, Bahia, Brasil and Piracicaba, Sao  
567 Paulo, Brasil.

568 Foster PL (2007). Stress-induced mutagenesis in bacteria. Crit Rev Biochem Mol Biol 42:373-  
569 397.

570 Fox GE (2010). Origin and evolution of the ribosome. In: The Origins of Life. Cold Spring Harb  
571 Perspect Biol, pp 2:a003483.

572 Ghobakhlou A, Johnston A, Harris L, Antoun H, Laberge S (2015). Microarray transcriptional  
573 profiling of Arctic *Mesorhizobium* strain N33 at low temperature provides insights into cold  
574 adaption strategies. BMC Genomics 16:383-396.

575 Godin-Roulling A, Schmidpeter PAM, Schmid FX, Feller G (2015). Functional adaptations of  
576 the bacterial chaperone trigger factor to extreme environmental temperatures. Environ Microbiol  
577 17:2407-2420.

578 Goris J, Konstantinidis KT, Klappenbach JA, Coenye T, Vandamme P, Tiedje JM (2007). DNA-  
579 DNA hybridization values and their relationship to whole-genome sequence similarities. Int J  
580 Syst Evol Microbiol 57:81-91.

581 Graur D (2016). Prokaryotic Genome Evolution. In: Molecular and Genome Evolution. Sinauer  
582 Associates: Sunderland, MA, pp 451.

583 Kotlar HK, Lewin A, Johansen J, Throne-Holst M, Haverkamp T, Markussen S, *et al.* (2011).  
584 High coverage sequencing of DNA from microorganisms living in an oil reservoir 2.5 kilometres  
585 subsurface. Environmental Microbiology Reports 3:674-681.

586 Latif H, Lerman JA, Portnoy VA, Tarasova Y, Nagarajan H, Schrimpe-Rutledge AC, *et al.*  
587 (2013). The genome organization of *Thermotoga maritima* reflects its lifestyle. PLoS genetics  
588 9:e1003485.

589 L'Haridon S, Jiang L, Alain K, Chalopin M, Rouxel O, Beauverger M, *et al.* (2014). *Kosmotoga*  
590 *pacifica* sp. nov., a thermophilic chemoorganoheterotrophic bacterium isolated from an East  
591 Pacific hydrothermal sediment. Extremophiles 18:81-88.

592 López-García P, Zivanovic Y, Deschamps P, Moreira D (2015). Bacterial gene import and  
593 mesophilic adaptation in archaea. Nature reviews.Microbiology 13:447-456.

594 Markowitz VM, Chen IA, Palaniappan K, Chu K, Szeto E, Pillay M, *et al.* (2014). IMG 4  
595 version of the integrated microbial genomes comparative analysis system. Nucleic Acids Res  
596 42:D560-7.

597 McClure R, Balasubramanian D, Sun Y, Bobrovskyy M, Sumby P, Genco Ca, *et al.* (2013).  
598 Computational analysis of bacterial RNA-Seq data. Nucleic Acids Res 41:e140.

599 Mega R, Manzoku M, Shinkai A, Nakagawa N, Kuramitsu S, Masui R (2010). Very rapid  
600 induction of a cold shock protein by temperature downshift in *Thermus thermophilus*. Biochem  
601 Biophys Res Commun 399:336-340.

602 Mykytczuk NCS, Foote SJ, Omelon CR, Southam G, Greer CW, Whyte LG (2013). Bacterial  
603 growth at -15°C; molecular insights from the permafrost bacterium *Planococcus halocryophilus*  
604 Or1. The ISME journal 7:1211-1226.

605 Nanavati DM, Thirangoon K, Noll KM (2006). Several archaeal homologs of putative  
606 oligopeptide-binding proteins encoded by *Thermotoga maritima* bind sugars. Appl Environ  
607 Microbiol 72:1336-1345.

608 Nesbø CL, Swithers KS, Dahle H, Haverkamp TH, Birkeland N, Sokolova T, *et al.* (2015).  
609 Evidence for extensive gene flow and *Thermotoga* subpopulations in subsurface and marine  
610 environments. The ISME Journal 9:1532-1542.

611 Nesbø CL, Kumaraswamy R, Dlutek M, Doolittle WF, Foght J (2010). Searching for mesophilic  
612 *Thermotogales* bacteria: "Mesotogas" in the wild. Appl Environ Microbiol 76:4896-4900.

613 Nunoura T, Hirai M, Imachi H, Miyazaki M, Makita H, Hirayama H, *et al.* (2010). *Kosmotoga*  
614 *arenicorallina* sp. nov. a thermophilic and obligately anaerobic heterotroph isolated from a  
615 shallow hydrothermal system occurring within a coral reef, southern part of the Yaeyama  
616 Archipelago, Japan, reclassification of *Thermococcoides shengliensis* as *Kosmotoga*  
617 *shengliensis* comb. nov., and emended description of the genus *Kosmotoga*. Arch Microbiol  
618 192:811-819.

619 Phadtare S (2004). Recent developments in bacterial cold-shock response. Curr Issues Mol Biol  
620 6:125-136.

621 Phadtare S, Hwang J, Severinov K, Inouye M (2003). CspB and CspL, thermostable cold-shock  
622 proteins from *Thermotoga maritima*. Genes to Cells 8:801-810.

623 Piette F, D'Amico S, Struvay C, Mazzucchelli G, Renaut J, Tutino ML, *et al.* (2010). Proteomics  
624 of life at low temperatures: trigger factor is the primary chaperone in the Antarctic bacterium  
625 *Pseudoalteromonas haloplanktis* TAC125. Mol Microbiol 76:120-132.

626 Pollo SMJ, Charchuk R, Nesbø CL (2016). Draft genome sequences of *Kosmotoga* sp. DU53 and  
627 *Kosmotoga arenicorallina* S304. GenomeA :in press.

628 Pollo SMJ, Zhaxybayeva O, Nesbø CL (2015). Insights into thermoadaptation and the evolution  
629 of mesophily from the bacterial phylum *Thermotogae*. Can J Microbiol 61:655-670.

630 Pysz MA, Ward DE, Shockley KR, Montero CI, Connors SB, Johnson MR, *et al.* (2004).  
631 Transcriptional analysis of dynamic heat-shock response by the hyperthermophilic bacterium  
632 *Thermotoga maritima*. Extremophiles 8:209-217.

633 Qiu Y, Cho BK, Park YS, Lovley D, Palsson B, Zengler K (2010). Structural and operational  
634 complexity of the *Geobacter sulfurreducens* genome. Genome Res 20:1304-1311.

635 Raghubeer EV, Matches JR (1990). Temperature range for growth of *Escherichia coli* serotype  
636 0157:H7 and selected coliforms in *E. coli* medium. J Clin Microbiol 28:803-805.

637 Ratkowsky DA, Lowry RK, McMeekin TA, Stokes AN, Chandler RE (1983). Model for  
638 bacterial culture growth rate throughout the entire biokinetic temperature range. J Bacteriol  
639 154:1222-1226.

640 Robinson MD, Smyth GK (2008). Small-sample estimation of negative binomial dispersion, with  
641 applications to SAGE data. Biostatistics 9:321-332.

642 Rodriguez-R LM, Konstantinidis KT (2016). The enveomics collection: a toolbox for specialized  
643 analyses of microbial genomes and metagenomes. Peer J Preprints 4:e19001.

644 Sakanaka A, Kuboniwa M, Takeuchi H, Hashino E, Amano A (2015). Arginine-ornithine  
645 antiporter ArcD controls arginine metabolism and interspecies biofilm development of  
646 *Streptococcus gordonii*. J Biol Chem 290:21185-21198.

647 Schumann W (2009). Temperature sensors of eubacteria. Advances in applied microbiology  
648 67:213-256.

649 Sievert S, Vetriani C (2012). Chemoautotrophy at Deep-Sea Vents: Past, Present, and Future.  
650 Oceanography 25:218-233.

651 Swinnen IAM, Bernaerts K, Dens EJJ, Geeraerd AH, Van Impe J. F. (2004). Predictive  
652 modelling of the microbial lag phase: A review. Int J Food Microbiol 94:137-159.

653 Swithers KS, DiPippo JL, Bruce DC, Detter C, Tapia R, Han S, *et al.* (2011). Genome sequence  
654 of *Kosmotoga olearia* strain TBF 19.5.1, a thermophilic bacterium with a wide growth  
655 temperature range, isolated from the Troll B oil platform in the North Sea. J Bacteriol 193:5566-  
656 5567.

657 Takai K, Nakamura K, Toki T, Tsunogai U, Miyazaki M, Miyazaki J, *et al.* (2008). Cell  
658 proliferation at 122°C and isotopically heavy CH<sub>4</sub> production by a hyperthermophilic  
659 methanogen under high-pressure cultivation. Proc Natl Acad Sci U S A 105:10949-10954.

660 Wang Z, Tong W, Wang Q, Bai X, Chen Z, Zhao J, *et al.* (2012). The temperature dependent  
661 proteomic analysis of *Thermotoga maritima*. PloS one 7:e46463.

662 Zhaxybayeva O, Swithers KS, Foght J, Green AG, Bruce D, Detter C, *et al.* (2012). Genome  
663 sequence of the mesophilic Thermotogales bacterium *Mesotoga prima* MesG1.Ag.4.2 reveals the  
664 largest Thermotogales genome to date. Genome Biol Evol 4:700-708.

665 Zhaxybayeva O, Swithers KS, Lapierre P, Fournier GP, Bickhart DM, DeBoy RT, *et al.* (2009).  
666 On the chimeric nature, thermophilic origin, and phylogenetic placement of the *Thermotogales*.  
667 Proc Natl Acad Sci U S A 106:5865-5870.

668 Zhu Q, Kosoy M, Dittmar K (2014). HGTector: An automated method facilitating genome-wide  
669 discovery of putative horizontal gene transfers. BMC Genomics 15:717.

670

671

## Figure Legends:

**Figure 1. Growth rate of *K. olearia* as a function of temperature.** Isothermic growth curves were generated at each temperature from an inoculum grown at that temperature for at least three transfers (except for 25°C and 80°C, for which an inoculum from the same temperature could not be generated; see Supplementary Information.). Up-shifted and down-shifted growth curves were generated from an inoculum that was grown at lower and higher temperatures, respectively. Red squares, growth temperature up-shifted from 65°C to 77°C or from 40°C to 65°C; Blue circles, growth temperature down-shifted from 77°C to 65°C, 65°C to 40°C, or 40°C to 30°C. Data points represent the mean of replicate cultures (see Text S1 in the supplemental material); error bars represent standard error.

**Figure 2. Model of energy generation pathway in *K. olearia* during growth on pyruvate.** The model includes genes likely involved in conversion of pyruvate to acetate, CO<sub>2</sub>, H<sub>2</sub>, and ATP. The genes were selected from the list of genes highly expressed across all temperature conditions (Supplementary Table S3). Acetate transport is not shown. The dashed box indicates hydrogenase activity. The two highly expressed hydrogenases are shown, but their potential interactions with each other or with the membrane are not known. Increased expression of citrate synthase at low temperature, which could redirect acetyl-CoA away from acetate production, is shown in grey. The model also explains the observed lower ratio of carbon dioxide to hydrogen produced by growth on maltose vs. pyruvate (not shown), as during growth on maltose reduced electron carriers would be generated from the conversions of maltose to pyruvate.

**Figure 3. Biplot of the principal component analysis of 12 transcriptomes.** Each transcriptome is denoted by a point, while genes are represented by vectors. Genes that point into a specific "temperature quadrant" are up-regulated at the growth temperature(s) of that quadrant, and the five longest (i.e., most highly correlated) gene vectors pointing to each quadrant are shown. Co-ordinates and vector length for all genes can be found in Supplementary Table S4 . It should be noted that the *ffs* (Kole\_R0010) transcript is only 115 nt, and may not have been fully represented in every transcriptome due to our isolation protocol which selects against small RNA (<200 nucleotides). Also, the high expression of the alcohol dehydrogenase (Kole\_0742) is probably due to the RNA isolation method (see Supplementary Information.).

**Figure 4. Difference between observed and expected number of temperature responsive genes across functional categories.** Functional categories were assigned using the Clusters of Orthologous Groups (COG) database as implemented in IMG (Markowitz et al, 2014) and are denoted by one-letter abbreviations along the X-axis (see Figure S3 legend for notations). NC, for "no category", denotes genes not assigned to a functional category. For each temperature treatment (30°C, 40°C and 77°C) only the temperature-responsive fraction of the *K. olearia* genome was considered. If the temperature-responsive genes were randomly distributed across functional categories we would expect the same fraction of temperature-responsive genes in each COG category. The difference (in percent) between the observed and expected number of temperature responsive genes is plotted on the Y-axis with positive and negative values referring to over- and under-representation of the temperature-responsive genes, respectively. For actual number of genes in each COG category see Supplementary Figure S3.

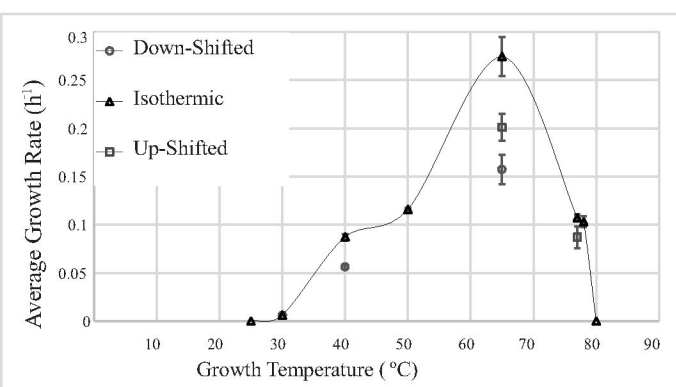





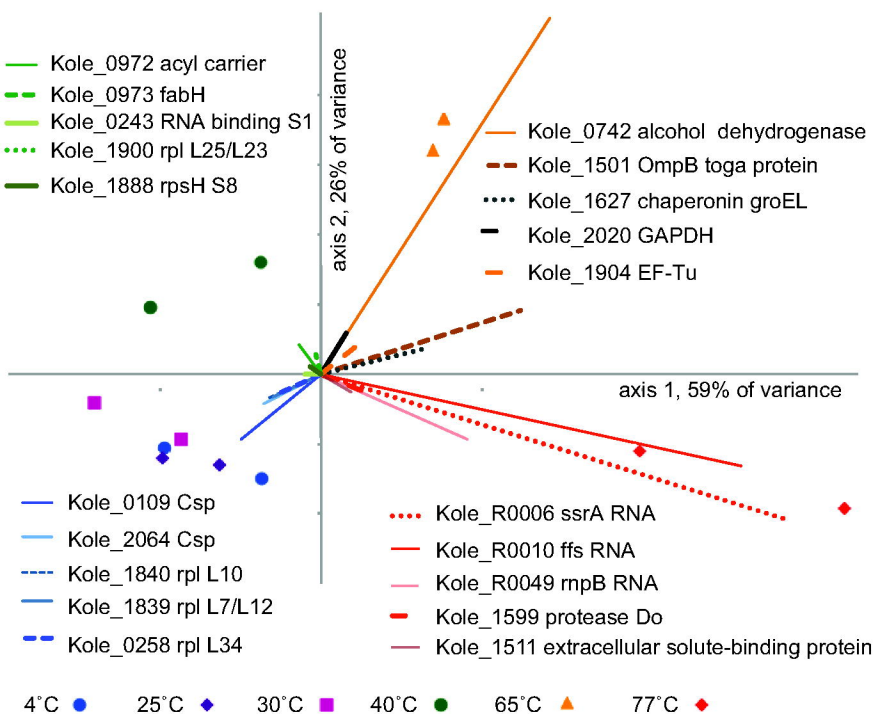

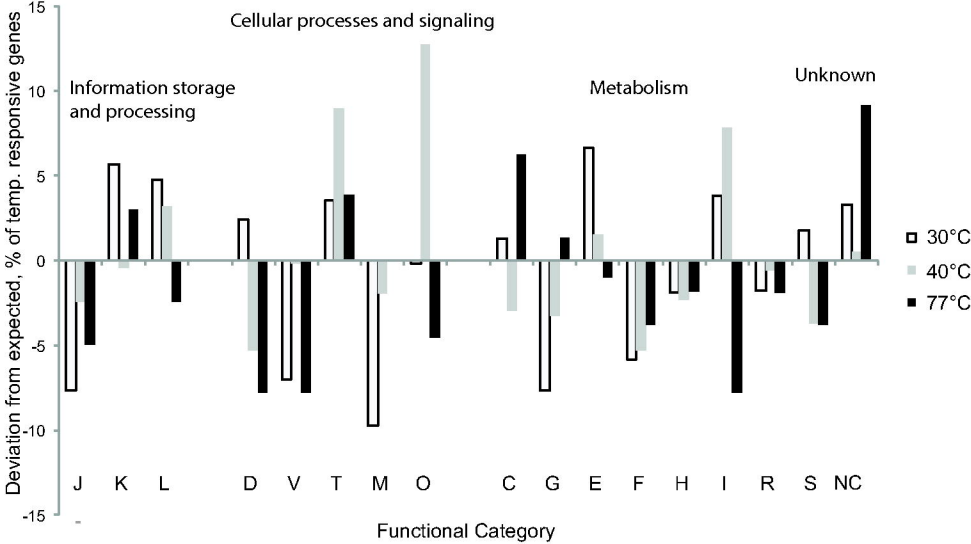

**Table 1. Gene expression in selected laterally acquired temperature-responsive**

**genes.** At each temperature, the listed RPKM values represent the average expression levels across replicates. Values that are significantly different from 65°C are shown in bold font.

| Locus Tag | Functional annotation                              | 30°C <sup>a</sup> | 40°C        | 65°C | 77°C       | Identified by         |
|-----------|----------------------------------------------------|-------------------|-------------|------|------------|-----------------------|
| Kole_0109 | Cold shock protein                                 | <b>5602</b>       | <b>892</b>  | 222  | 119        | Phylogenetic analysis |
| Kole_0110 | Histidine kinase                                   | 175               | <b>333</b>  | 144  | 312        | Phylogenetic analysis |
| Kole_0111 | Response regulator                                 | 166               | 204         | 173  | <b>446</b> | HGTector              |
| Kole_0505 | Glycerol dehydrogenase                             | 721               | <b>2668</b> | 752  | 1242       | HGTector              |
| Kole_0506 | Hypothetical protein                               | 559               | <b>2037</b> | 461  | 783        | Phylogenetic analysis |
| Kole_0507 | Hypothetical protein                               | 555               | <b>2193</b> | 521  | 809        | HGTector              |
| Kole_0508 | Poly (3-hydroxybutyrate) depolymerase-like protein | 212               | 423         | 200  | 314        | HGTector              |
| Kole_0897 | Ribosomal RNA methyltransferase, rmlL              | <b>503</b>        | 498         | 228  | 232        | HGTector              |
| Kole_0922 | DEAD/DEAH box                                      | <b>755</b>        | <b>288</b>  | 89   | 102        | HGTector              |

|           |                                             |             |             |      |            |                          |
|-----------|---------------------------------------------|-------------|-------------|------|------------|--------------------------|
|           | helicase                                    |             |             |      |            |                          |
| Kole_0969 | 3-oxoacyl-ACP                               | <b>2386</b> | <b>3063</b> | 939  | 1424       | HGTector                 |
|           | synthase III , FabH                         |             |             |      |            |                          |
| Kole_0970 | enoyl-ACP reductase                         | 2226        | 3243        | 1486 | 1641       | HGTector                 |
|           | II , fabK                                   |             |             |      |            |                          |
| Kole_0971 | malonyl CoA-acyl                            | 2304        | 4211        | 2303 | 2647       | HGTector                 |
|           | carrier protein                             |             |             |      |            |                          |
|           | transacylase, fabD                          |             |             |      |            |                          |
| Kole_0972 | acyl carrier protein                        | 6531        | 12601       | 4850 | 4241       | HGTector                 |
| Kole_0973 | 3-oxoacyl-ACP                               | 4815        | 9257        | 4753 | 4498       | HGTector                 |
|           | synthase II, fabF                           |             |             |      |            |                          |
| Kole_1015 | Response regulator                          | <b>1289</b> | <b>515</b>  | 95   | 130        | HGTector                 |
| Kole_1016 | Response regulator                          | <b>783</b>  | <b>280</b>  | 54   | 72         | HGTector                 |
| Kole_1017 | Histidine kinase                            | <b>697</b>  | <b>275</b>  | 59   | 90         | Phylogenetic<br>analysis |
| Kole_1281 | N-acylneuraminate-9-<br>phosphate synthase  | 482         | 699         | 315  | <b>840</b> | HGTector                 |
| Kole_1282 | N-acylneuraminate<br>cytidyltransferase     | 244         | <b>283</b>  | 128  | <b>315</b> | Phylogenetic<br>analysis |
| Kole_1718 | Ribosomal RNA<br>methyltransferase,<br>rmlH | <b>531</b>  | 332         | 211  | 203        | HGTector                 |
| Kole_1745 | PPIase FKBP-type                            | 2783        | 2382        | 1541 | <b>430</b> | HGTector                 |

---
